# Supplementary material for: Rehabilitation following operative treatment of acute Achilles tendon ruptures: a systematic review and meta-analysis
Source: PubMed Central journal article supplement — EFORT Open Rev. 2022 Oct 26;7(10):680–91. doi: 10.1530/EOR-22-0072 (PMC9619394; doi:10.1530/eor-22-0072), 2022-10-26
Supplement: EOR-22-0072supplementary_table_1.pdf [file EOR-22-0072supplementary_table_1.pdf]

## Appendix 1

### Detailed search strategy for each database:

#### Pubmed

("achilles tendon"[Mesh] OR ("achilles tendon"[All Fields] OR "calcaneal tendon"[All Fields])) AND ("rupture"[All Fields] OR "ruptures"[All Fields] OR "tear"[All Fields] OR "tearing"[All Fields]) AND ("surgery"[Subheading] OR "surgical"[All Fields] OR "surgery"[All Fields] OR "operative"[All Fields] OR "operation"[All Fields] OR "repair"[All Fields] OR "repaired"[All Fields] OR "post-operative"[All Fields] OR "postoperative"[All Fields])

#### CINAHL

((MH "achilles tendon") OR "achilles tendon" OR "calcaneal tendon") AND ("rupture" OR "ruptures" OR "tear" OR "tearing") AND ("surgical" OR "surgery" OR "operative" OR "operation" OR "repair" OR "repaired" OR "post-operative" OR "postoperative")

#### Embase

('achilles tendon'/exp OR 'achilles tendon':ti,ab OR 'calcaneal tendon':ti,ab) AND ('rupture':ti,ab OR 'ruptures':ti,ab OR 'tear':ti,ab OR 'tearing':ti,ab) AND ('surgery'/exp OR 'surgical':ti,ab OR 'surgery':ti,ab OR 'operative':ti,ab OR 'operation':ti,ab OR 'repair':ti,ab OR 'repaired':ti,ab OR 'post-operative':ti,ab OR 'postoperative':ti,ab)

#### Scopus

TITLE-ABS ("achilles tendon" OR "achilles tendon" OR "calcaneal tendon") AND TITLE-ABS ("rupture" OR "ruptures" OR "tear" OR "tearing") AND TITLE-ABS ("surgical" OR "surgery" OR "operative" OR "operation" OR "repair" OR "repaired" OR "post-operative" OR "postoperative")

#### Central

(MeSH descriptor: [Achilles Tendon] OR "achilles tendon":ti,ab,kw OR "calcaneal tendon":ti,ab,kw) AND ("rupture":ti,ab,kw OR "ruptures":ti,ab,kw OR "tear":ti,ab,kw OR "tearing":ti,ab,kw) AND "surgical":ti,ab,kw OR "surgery":ti,ab,kw OR "operative":ti,ab,kw OR "operation":ti,ab,kw OR "repair":ti,ab,kw OR "repaired":ti,ab,kw OR "post-operative":ti,ab,kw OR "postoperative":ti,ab,kw)
