# Supplementary material for: Rehabilitation following operative treatment of acute Achilles tendon ruptures: a systematic review and meta-analysis
Source: PubMed Central journal article supplement — EFORT Open Rev. 2022 Oct 26;7(10):680–91. doi: 10.1530/EOR-22-0072 (PMC9619394; doi:10.1530/eor-22-0072), 2022-10-26
Supplement: EOR-22-0072supplementary_table_2.pdf [file EOR-22-0072supplementary_table_2.pdf]

## Appendix 2

Table X | Individual rehabilitation protocols of all studies included to the systematic review and meta-analysis

| Author / Year                                 | Group | Week 1                                                                     | Week 2                                                                     | Week 3                                                                     | Week 4                                                                     | Week 5                                                                     | Week 6                                                                     | Week 7                                                                     | Week 8 | > Week 9 |  |
|-----------------------------------------------|-------|----------------------------------------------------------------------------|----------------------------------------------------------------------------|----------------------------------------------------------------------------|----------------------------------------------------------------------------|----------------------------------------------------------------------------|----------------------------------------------------------------------------|----------------------------------------------------------------------------|--------|----------|--|
| <b>Group 1 (WB + M) vs. Group 2 (WB + IM)</b> |       |                                                                            |                                                                            |                                                                            |                                                                            |                                                                            |                                                                            |                                                                            |        |          |  |
| Kangas et al. 2003                            | 1     | FWB<br>below-knee<br>dorsal cast<br>active free PF and<br>DF limited to 0° | FWB<br>below-knee<br>dorsal cast<br>active free PF and<br>DF limited to 0° | FWB<br>below-knee<br>dorsal cast<br>active free PF and<br>DF limited to 0° | FWB<br>below-knee<br>dorsal cast<br>active free PF and<br>DF limited to 0° | FWB<br>below-knee<br>dorsal cast<br>active free PF and<br>DF limited to 0° | FWB<br>below-knee<br>dorsal cast<br>active free PF and<br>DF limited to 0° | FWB<br>below-knee<br>dorsal cast<br>active free PF and<br>DF limited to 0° |        |          |  |
|                                               | 2     | FWB<br>below-knee<br>dorsal cast<br>fixed in 0°<br>(neutral position)      |        |          |  |
|                                               | 1     | FWB<br>below-knee<br>dorsal cast<br>active free PF and<br>DF limited to 0° | FWB<br>below-knee<br>dorsal cast<br>active free PF and<br>DF limited to 0° | FWB<br>below-knee<br>dorsal cast<br>active free PF and<br>DF limited to 0° | FWB<br>below-knee<br>dorsal cast<br>active free PF and<br>DF limited to 0° | FWB<br>below-knee<br>dorsal cast<br>active free PF and<br>DF limited to 0° | FWB<br>below-knee<br>dorsal cast<br>active free PF and<br>DF limited to 0° | FWB<br>below-knee<br>dorsal cast<br>active free PF and<br>DF limited to 0° |        |          |  |
|                                               | 2     | FWB<br>below-knee<br>dorsal cast<br>fixed in 0°<br>(neutral position)      |        |          |  |
| Kauranen et al. 2002                          | 1     | NWB<br>below-knee<br>dorsal cast<br>active free PF and<br>DF limited to 0° | NWB<br>below-knee<br>dorsal cast<br>active free PF and<br>DF limited to 0° | FWB<br>below-knee<br>dorsal cast<br>active free PF and<br>DF limited to 0° | FWB<br>below-knee<br>dorsal cast<br>active free PF and<br>DF limited to 0° | FWB<br>below-knee<br>dorsal cast<br>active free PF and<br>DF limited to 0° | FWB<br>below-knee<br>dorsal cast<br>active free PF and<br>DF limited to 0° | FWB<br>below-knee<br>dorsal cast<br>active free PF and<br>DF limited to 0° |        |          |  |
|                                               | 2     | NWB<br>below-knee<br>plaster cast<br>fixed in 0°<br>(neutral position)     | NWB<br>below-knee<br>plaster cast<br>fixed in 0°<br>(neutral position)     | FWB<br>below-knee<br>plaster cast<br>fixed in 0°<br>(neutral position)     |        |          |  |
| Lantto et al. 2015                            | 1     | NWB<br>below-knee<br>dorsal cast<br>active free PF and<br>DF limited to 0° | NWB<br>below-knee<br>dorsal cast<br>active free PF and<br>DF limited to 0° | FWB<br>below-knee<br>dorsal cast<br>active free PF and<br>DF limited to 0° | FWB<br>below-knee<br>dorsal cast<br>active free PF and<br>DF limited to 0° | FWB<br>below-knee<br>dorsal cast<br>active free PF and<br>DF limited to 0° | FWB<br>below-knee<br>dorsal cast<br>active free PF and<br>DF limited to 0° | FWB<br>below-knee<br>dorsal cast<br>active free PF and<br>DF limited to 0° |        |          |  |



|                              |   |                                                         |                                                        |                                                                          |                                                                          |                                                                           |                                                                           |                                                                   |                                                                   |
|------------------------------|---|---------------------------------------------------------|--------------------------------------------------------|--------------------------------------------------------------------------|--------------------------------------------------------------------------|---------------------------------------------------------------------------|---------------------------------------------------------------------------|-------------------------------------------------------------------|-------------------------------------------------------------------|
| Porter et al. 2014           | 4 | NWB<br>below-the-knee synthetic cas in natural equinus  | NWB<br>Plaster Cast fixed in less PF (mid equinus)     | NWB<br>Plaster Cast fixed in less PF (mid equinus)                       | NWB<br>Plaster Cast fixed in 0° DE                                       | FWB<br>Plaster Cast fixed in 0° DE                                        | FWB<br>Plaster Cast fixed in 0° DE                                        |                                                                   |                                                                   |
|                              | 1 | NWB<br>Heavy crepe bandage and immediate ROM exercises  | NWB<br>Heavy crepe bandage and immediate ROM exercises | PWB<br>Removable TA boot with 3 heel wedges                              | PWB<br>Removable TA boot with 3 heel wedges                              | FWB<br>Removable TA boot with 1-2 heel wedges                             | FWB<br>Removable TA boot with 1-2 heel wedges                             | FWB<br>Removable TA boot without heel wedges and weanig from boot | FWB<br>Removable TA boot without heel wedges and weanig from boot |
|                              | 4 | NWB<br>Hanging equinus plaster of paris slab            | NWB<br>Hanging equinus plaster of paris slab           | NWB<br>Dorsiflexion blocking orthosis at neutral position                | NWB<br>Dorsiflexion blocking orthosis at neutral position                | NWB<br>Dorsiflexion blocking orthosis at neutral position                 | NWB<br>Dorsiflexion blocking orthosis at neutral position                 | NWB<br>Dorsiflexion blocking orthosis at neutral position         | NWB<br>Dorsiflexion blocking orthosis at neutral position         |
|                              | 1 | 10 kg of max weight bearing and two crutches in week 1  | 25 kg of max weight bearing and 1 crutch in week 2     | 40kg of max weight bearing with crutches                                 | FWB<br>Walking boot Full plantarflexion till 0° Dorsiflexion             | FWB<br>Walking boot Full plantarflexion till 0° Dorsiflexion              | FWB<br>Walking boot Full plantarflexion till 0° Dorsiflexion              | FWB<br>Walking boot Full plantarflexion and full Dorsiflexion     | FWB<br>Walking boot Full plantarflexion and full Dorsiflexion     |
| De la Fuente et al. 2016 (1) |   | Walking boot Full plantarflexion till -15° Dorsiflexion | Walking boot Full plantarflexion till -7° Dorsiflexion | Walking boot Full plantarflexion till 0° Dorsiflexion                    |                                                                          |                                                                           |                                                                           |                                                                   |                                                                   |
|                              | 4 | NWB<br>Walking boot Immobilization                      | NWB<br>Walking boot Immobilization                     | NWB<br>Walking boot Immobilization                                       | NWB<br>Full plantarflexion till 0° Dorsiflexion                          | NWB<br>Full plantarflexion till 0° Dorsiflexion                           | NWB<br>Full plantarflexion till 0° Dorsiflexion                           | FWB<br>Full plantarflexion and full Dorsiflexion                  | FWB<br>Full plantarflexion and full Dorsiflexion                  |
|                              | 1 | 10 kg of max weight bearing and two crutches in week 1  | 25 kg of max weight bearing and 1 crutch in week 2     | 40kg of max weight bearing with crutches                                 | FWB<br>Walking boot Full plantarflexion till 0° Dorsiflexion             | FWB<br>Walking boot Full plantarflexion till 0° Dorsiflexion              | FWB<br>Walking boot Full plantarflexion till 0° Dorsiflexion              | FWB<br>Walking boot Full plantarflexion and full Dorsiflexion     | FWB<br>Walking boot Full plantarflexion and full Dorsiflexion     |
|                              |   | Walking boot Full plantarflexion till -15° Dorsiflexion | Walking boot Full plantarflexion till -7° Dorsiflexion | Walking boot Full plantarflexion till 0° Dorsiflexion                    |                                                                          |                                                                           |                                                                           |                                                                   |                                                                   |
| De la Fuente et al. 2016 (2) | 4 | NWB<br>Walking boot Immobilization                      | NWB<br>Walking boot Immobilization                     | NWB<br>Walking boot Immobilization                                       | NWB<br>Full plantarflexion till 0° Dorsiflexion                          | NWB<br>Full plantarflexion till 0° Dorsiflexion                           | NWB<br>Full plantarflexion till 0° Dorsiflexion                           | FWB<br>Full plantarflexion and full Dorsiflexion                  | FWB<br>Full plantarflexion and full Dorsiflexion                  |
|                              | 1 | NWB<br>below-knee splint in 10° PF                      | FWB<br>below-knee splint in 10° PF                     | FWB<br>Achillotrain extra heel elevation Mobilization without limitation | FWB<br>Achillotrain extra heel elevation Mobilization without limitation | FWB<br>Achillotrain normal heel elevation Mobilization without limitation | FWB<br>Achillotrain normal heel elevation Mobilization without limitation |                                                                   |                                                                   |
|                              | 4 | NWB<br>below-knee splint in 10° PF                      | NWB<br>below-knee splint in 10° PF                     | NWB<br>below-knee splint in 10° PF                                       | NWB<br>below-knee splint in 10° PF                                       | FWB<br>below-knee splint in neutral-                                      | FWB<br>below-knee splint in neutral-                                      |                                                                   |                                                                   |
|                              |   |                                                         |                                                        |                                                                          |                                                                          |                                                                           |                                                                           |                                                                   |                                                                   |
| Groetelaers et al. 2014      | 1 | NWB<br>below-knee splint in 10° PF                      | FWB<br>below-knee splint in 10° PF                     | FWB<br>Achillotrain extra heel elevation Mobilization without limitation | FWB<br>Achillotrain extra heel elevation Mobilization without limitation | FWB<br>Achillotrain normal heel elevation Mobilization without limitation | FWB<br>Achillotrain normal heel elevation Mobilization without limitation |                                                                   |                                                                   |
|                              | 4 | NWB<br>below-knee splint in 10° PF                      | NWB<br>below-knee splint in 10° PF                     | NWB<br>below-knee splint in 10° PF                                       | NWB<br>below-knee splint in 10° PF                                       | FWB<br>below-knee splint in neutral-                                      | FWB<br>below-knee splint in neutral-                                      |                                                                   |                                                                   |

|                                                 |   |                                                                     |                                                                     |                                                                     |                                                                     | position                                                            | position                                                            |                                                                     |                                                                     |                                                             |                                                             |
|-------------------------------------------------|---|---------------------------------------------------------------------|---------------------------------------------------------------------|---------------------------------------------------------------------|---------------------------------------------------------------------|---------------------------------------------------------------------|---------------------------------------------------------------------|---------------------------------------------------------------------|---------------------------------------------------------------------|-------------------------------------------------------------|-------------------------------------------------------------|
| <b>Group 2 (WB + IM) vs. Group 4 (NWB + IM)</b> |   |                                                                     |                                                                     |                                                                     |                                                                     |                                                                     |                                                                     |                                                                     |                                                                     |                                                             |                                                             |
| Costa et al. 2003                               | 2 | FWB<br>Off-the-shelf carbon-fibre orthosis with 3x1.5cm heel raise, | FWB<br>Stepwise reduction of 1.5cm heel raise every 2 weeks | FWB<br>Stepwise reduction of 1.5cm heel raise every 2 weeks |
|                                                 | 4 | NWB<br>Below-knee gravity equinus cast                              | FWB<br>Stepwise reduction of equinus every 2 weeks till 0°  | FWB<br>Stepwise reduction of equinus every 2 weeks till 0°  |
| Costa et al. 2006                               | 2 | FWB<br>Off-the-shelf carbon-fibre orthosis with 3x1.5cm heel raise, | FWB<br>Stepwise reduction of 1.5cm heel raise every 2 weeks | FWB<br>Stepwise reduction of 1.5cm heel raise every 2 weeks |
|                                                 | 4 | NWB<br>Below-knee gravity equinus cast                              | FWB<br>Stepwise reduction of equinus every 2 weeks till 0°  | FWB<br>Stepwise reduction of equinus every 2 weeks till 0°  |
| Kerkhoffs et al. 2002                           | 2 | PWB<br>semi-rigid wrap in 0° (neutral position)                     | FWB<br>semi-rigid wrap in 0° (neutral position)             | FWB<br>semi-rigid wrap in 0° (neutral position)             |
|                                                 | 4 | NWB<br>short-leg walking cast in 0° (neutral position)              | FWB<br>short-leg walking cast in 0° (neutral position)      | FWB<br>short-leg walking cast in 0° (neutral position)      |
| Maffuli et al. 2003 (2)                         | 2 | FWB<br>below-the-knee synthetic cast in natural equinus             | FWB<br>below-the-knee synthetic cast in natural equinus             | FWB<br>below-the-knee synthetic cast in natural position            |                                                             |                                                             |
|                                                 | 4 | NWB<br>below-the-knee synthetic cast in natural equinus             | NWB<br>below-the-knee synthetic cast in natural equinus             | NWB<br>below-the-knee synthetic cast in mid equinus                 | NWB<br>below-the-knee synthetic cast in mid equinus                 | NWB<br>below-the-knee synthetic cast in neutral position            |                                                             |                                                             |
| Agres et al. 2018                               | 2 | FWB<br>Fixed in walker boot with 30° PF                             | FWB<br>reduce walker boot position by 10° / week            | FWB<br>reduce walker boot position by 10° / week            |
|                                                 | 4 | NWB<br>Fixed in walker boot with 30° PF                             | FWB<br>reduce walker boot position by                       | FWB<br>reduce walker boot position by                       |

10° / week

10° / week

**Group 1 (WB + M) vs. Group 3 (NWB + M)**

|                    |   |                                                     |                                                     |                                                                                                                                                 |                                                                                                                                                 |                                                                                                                                                 |                                                                                                                                                 |                              |                              |
|--------------------|---|-----------------------------------------------------|-----------------------------------------------------|-------------------------------------------------------------------------------------------------------------------------------------------------|-------------------------------------------------------------------------------------------------------------------------------------------------|-------------------------------------------------------------------------------------------------------------------------------------------------|-------------------------------------------------------------------------------------------------------------------------------------------------|------------------------------|------------------------------|
|                    | 1 | NWB<br>posterior splint in relaxed equinus position | NWB<br>posterior splint in relaxed equinus position | FWB<br>fixed-angle hinged ankle-foot orthosis 20° plantarflexion, gradually reduce plantarflexion to 0°, active range of motion exercises 0-20° | FWB<br>fixed-angle hinged ankle-foot orthosis 20° plantarflexion, gradually reduce plantarflexion to 0°, active range of motion exercises 0-20° | FWB<br>fixed-angle hinged ankle-foot orthosis 20° plantarflexion, gradually reduce plantarflexion to 0°, active range of motion exercises 0-20° | FWB<br>fixed-angle hinged ankle-foot orthosis 20° plantarflexion, gradually reduce plantarflexion to 0°, active range of motion exercises 0-20° | FWB<br>weaning from orthosis | FWB<br>weaning from orthosis |
| Suchak et al. 2008 | 3 | NWB<br>posterior splint in relaxed equinus position | NWB<br>posterior splint in relaxed equinus position | FWB<br>fixed-angle hinged ankle-foot orthosis 20° plantarflexion, gradually reduce plantarflexion to 0°, active range of motion exercises 0-20° | FWB<br>fixed-angle hinged ankle-foot orthosis 20° plantarflexion, gradually reduce plantarflexion to 0°, active range of motion exercises 0-20° | FWB<br>fixed-angle hinged ankle-foot orthosis 20° plantarflexion, gradually reduce plantarflexion to 0°, active range of motion exercises 0-20° | FWB<br>fixed-angle hinged ankle-foot orthosis 20° plantarflexion, gradually reduce plantarflexion to 0°, active range of motion exercises 0-20° | FWB<br>weaning from orthosis | FWB<br>weaning from orthosis |

**Group 1 (WB + M) vs. Group 3 (NWB + M) vs. Group 4 (NWB + IM)**

|                      |   |                                                     |                                                     |                                                               |                                                                      |                                                                      |                                                                      |                               |                               |                                   |
|----------------------|---|-----------------------------------------------------|-----------------------------------------------------|---------------------------------------------------------------|----------------------------------------------------------------------|----------------------------------------------------------------------|----------------------------------------------------------------------|-------------------------------|-------------------------------|-----------------------------------|
|                      | 1 | PWB<br>Walking boot 3 heel wedges<br>Immobilization | PWB<br>Walking boot 3 heel wedges<br>Immobilization | PWB<br>Walking boot 3 heel wedges<br>Early ankle Mobilization | FWB<br>Walking boot 3 heel wedges<br>Early ankle Mobilization on NWB | FWB<br>Walking boot 2 heel wedges<br>Early ankle Mobilization on NWB | FWB<br>Walking boot 1 heel wedges<br>Early ankle Mobilization on NWB | FWB<br>active range of motion | FWB<br>active range of motion | FWB<br>Exercise bike and swimming |
| Eliasson et al. 2018 | 3 | NWB<br>Walking boot 3 heel wedges<br>Immobilization | NWB<br>Walking boot 3 heel wedges<br>Immobilization | NWB<br>Walking boot 3 heel wedges<br>Early ankle Mobilization | NWB<br>Walking boot 3 heel wedges<br>Early ankle Mobilization        | NWB<br>Walking boot 2 heel wedges<br>Early ankle Mobilization        | NWB<br>Walking boot 1 heel wedges<br>Early ankle Mobilization        | NWB<br>active range of motion | NWB<br>active range of motion | FWB<br>Exercise bike and swimming |
|                      | 4 | NWB<br>Walking boot 3 heel wedges<br>Immobilization | NWB<br>Walking boot 3 heel wedges<br>Immobilization | NWB<br>Walking boot 3 heel wedges<br>Immobilization           | NWB<br>Walking boot 3 heel wedges<br>Immobilization                  | NWB<br>Walking boot 2 heel wedges<br>Immobilization                  | NWB<br>Walking boot 1 heel wedges<br>Immobilization                  | NWB<br>active range of motion | NWB<br>active range of motion | FWB<br>Exercise bike and swimming |

**Group 3 (NWB + M) vs. Group 4 (NWB + IM)**

|                       |   |                                                                    |                                                                    |                                                           |                                                           |                                                           |                                                           |                                                           |                       |                       |
|-----------------------|---|--------------------------------------------------------------------|--------------------------------------------------------------------|-----------------------------------------------------------|-----------------------------------------------------------|-----------------------------------------------------------|-----------------------------------------------------------|-----------------------------------------------------------|-----------------------|-----------------------|
|                       | 3 | NWB<br>below-the-knee dorsal plaster splint in spontaneous equinus | NWB<br>below-the-knee dorsal plaster splint in spontaneous equinus | NWB<br>ROM Walker-brace with free PF and DF limited to 0° | NWB<br>ROM Walker-brace with free PF and DF limited to 0° | FWB<br>ROM Walker-brace fixed in neutral position (DE 0°) | FWB<br>ROM Walker-brace fixed in neutral position (DE 0°) | FWB<br>ROM Walker-brace fixed in neutral position (DE 0°) | FWB<br>1cm heel rise  | FWB<br>1cm heel rise  |
| Mortensen et al. 1999 | 4 | NWB<br>below-the-knee                                              | NWB<br>below-the-knee                                              | NWB<br>below-the-knee                                     | NWB<br>below-the-knee                                     | FWB<br>below-the-knee                                     | FWB<br>below-the-knee                                     | FWB<br>below-the-knee                                     | FWB<br>1cm heel raise | FWB<br>1cm heel raise |

|                |                |                |                |                |                |                   |
|----------------|----------------|----------------|----------------|----------------|----------------|-------------------|
| dorsal plaster    |
| splint in      | splint in neutral |
| spontaneous    | spontaneous    | spontaneous    | spontaneous    | spontaneous    | spontaneous    | position          |
| equinus        | equinus        | equinus        | equinus        | equinus        | equinus        |                   |

*WB = weightbearing; FWB = full weightbearing; PWB = partial weightbearing; NWB = non weightbearing; M = mobilization; IM = immobilization; DE = dorsal extension; PF = plantar flexion*
